# Supplementary material for: Nucleus accumbens deep-brain stimulation efficacy in ACTH-pretreated rats: alterations in mitochondrial function relate to antidepressant-like effects
Source: PubMed Central journal article supplement (PMC4931612; doi:10.1038/tp.2016.84), 2016-06-21

S1

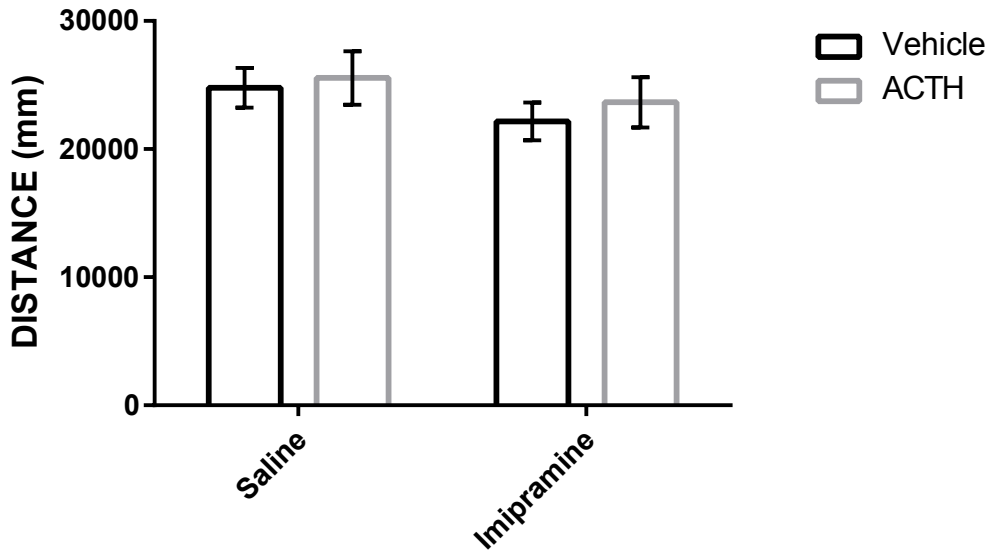

Supplement: tp201684x4.pdf [file tp201684x4.pdf]
